# Supplementary material for: Echoic Sensory Substitution Information in a Single Obstacle Circumvention Task
Source: PLoS One. 2016 Aug 5;11(8):e0160872. doi: 10.1371/journal.pone.0160872 (PMC4975488; doi:10.1371/journal.pone.0160872)
Supplement: S1 File — (XLSX) [file pone.0160872.s001.xlsx]

## Sheet: Collisions
	Number of collisions under SSD guidance. No collisions occurred under visual guidance.
	Obstacle location
Subject number	Left	Midline	Right
1	0	0	1
2	1	1	0
3	2	1	0
4	2	0	1
5	1	0	0
6	0	0	0
7	0	0	0
8	1	0	2
9	0	0	1
10	0	0	0
11	0	0	0
12	0	1	1

## Sheet: Proportion_right_side_avoidance
VISION					SSD
Proportion right direction	Obstacle position: Left				Proportion right direction	Obstacle position: Left
Subject number	Trials rightwards		Sum total non-collisions		Subject number	Trials rightwards		Sum total non-collisions
1	5		6		1	0		6
2	6		6		2	5		6
3	6		6		3	6		6
4	5		6		4	0		5
5	6		6		5	3		4
6	6		6		6	4		4
7	6		6		7	4		5
8	6		6		8	6		6
9	6		6		9	4		6
10	6		6		10	4		5
11	6		6		11	6		6
12	6		6		12	6		6
	Obstacle position: Midline					Obstacle position: Midline
Subject number	Trials rightwards		Sum total non-collisions		Subject number	Trials rightwards		Sum total non-collisions
1	3		6		1	0		6
2	4		6		2	1		6
3	0		6		3	2		6
4	0		6		4	2		5
5	3		6		5	1		5
6	1		6		6	2		6
7	4		6		7	4		6
8	2		6		8	2		6
9	0		6		9	3		6
10	3		6		10	5		6
11	1		6		11	2		6
12	5		6		12	3		5
	Obstacle position: Right					Obstacle position: Right
Subject number	Trials rightwards		Sum total non-collisions		Subject number	Trials rightwards		Sum total non-collisions
1	1		6		1	0		6
2	0		5		2	0		5
3	0		6		3	0		5
4	0		6		4	0		6
5	0		6		5	0		6
6	0		6		6	1		5
7	0		6		7	1		6
8	0		6		8	0		6
9	0		6		9	2		6
10	0		6		10	0		4
11	0		6		11	0		6
12	0		6		12	1		5

## Sheet: Buffer space
	Vision					SSD
	Obstacle position: Right					Obstacle position: Right
Subject number	Trial 1	Trial 2	Trial 3		Subject number	Trial 1	Trial 2	Trial 3
1	187.896	132.182	174.149		1	397.378	256.355	234.1
2	262.538	250.009	161.726		2	215.931	239.424	236.618
3	186.115	217.535	159.714		3	466.754	529.636	692.18
4	178.47	146.107	117.836		4	533.571	522.718	496.792
5	260.734	228.033	172.134		5	221.268	522.798	677.99
6	169.483	211.98	248.062		6	628.676	348.24	527.264
7	384.348	421.593	437.436		7	696.926	556.737	604.057
8	392.256	310.004	359.106		8	283.012	433.328	507.154
9	259.375	362.624	321.006		9	267.942	1103.24	684.436
10	185.169	242.724	215.69		10	352.747	539.919	543.365
11	98.5989	75.8499	92.5976		11	550.515	536.082	607.844
12	286.542	216.162	257.016		12	303.588	201.035	333.984
	Obstacle position: Midline					Obstacle position: Midline
Subject number	Trial 1	Trial 2	Trial 3		Subject number	Trial 1	Trial 2	Trial 3
1	235.168	177.256	195.685		1	307.929	237.916	263.008
2	176.612	126.782	157.453		2	188.933	272.647	233.428
3	136.983	189.623	180.397		3	576.876	549.903	465.647
4	203.511	207.827	146.099		4	364.903	361.406	482.275
5	167.2	187.204	194.341		5	333.108	305.299	353.354
6	150.204	132.714	160.494		6	423.438	370.11	472.875
7	277.081	233.036	342.655		7	519.689	564.709	652.645
8	323.401	327.818	278.456		8	447.977	312.855	594.745
9	275.876	226.58	221.308		9	626.134	661.763	503.17
10	178.961	118.583	145.312		10	458.769	440.164	424.228
11	247.369	104.053	89.6897		11	642.935	508.603	418.817
12	199.109	177.374	161.085		12	342.161	357.775	139.728
	Obstacle position: Left					Obstacle position: Left
Subject number	Trial 1	Trial 2	Trial 3		Subject number	Trial 1	Trial 2	Trial 3
1	257.995	254.846	242.062		1	173.781	324.641	520.611
2	246.074	204.273	280.915		2	236.19	246.303	276.977
3	181.555	165.401	165.455		3	182.996	279.588	322.382
4	248.277	139.081	130.756		4	402.927	212.48	262.042
5	241.826	403.678	169.387		5	697.608	619.52	648.884
6	169.288	164.853	229.167		6	594.102	362.784	800.89
7	216.569	287.993	315.108		7	661.531	757.063	737.682
8	315.073	390.285	327.384		8	526.406	258.709	451.568
9	283.267	337.741	331.927		9	624.829	772.552	800.94
10	166.25	227.785	171.613		10	750.56	470.635	790.208
11	120.364	94.5335	92.0116		11	339.396	414.494	443.119
12	283.849	261.82	279.835		12	374.454	513.352	433.874

## Sheet: Movement times
	Vision					SSD
	Obstacle position: Right					Obstacle position: Right
Subject number	Trial 1	Trial 2	Trial 3		Subject number	Trial 1	Trial 2	Trial 3
1	0.96	0.95	0.92		1	4.9	7.36	6.26
2	0.97	0.97	0.86		2	29.72	23.73	28.33
3	1.3	1.44	1.16		3	10.055	15.975	14.865
4	1.41	1.07	1.04		4	7.01	7.01	6.81
5	0.8	0.84	0.83		5	22.16	13.07	10.24
6	0.87	0.88	0.84		6	4.81	6.64	4.54
7	1.08045	1.08864	1.01955		7	5.38	6.38	8.46
8	1.32	1.42	1.25		8	8.88	14.96	7.46
9	1.05	1	1.06		9	3.62	10.06	6.19
10	0.89	0.9	0.98		10	8.65	20.26	15.62
11	0.78	0.79	0.78		11	4.87	4.7	4.03
12	1.535	1.715	1.495		12	5.755	4.53	8.5
	Obstacle position: Midline					Obstacle position: Midline
Subject number	Trial 1	Trial 2	Trial 3		Subject number	Trial 1	Trial 2	Trial 3
1	0.97	1.02	1.02		1	4.2	4.77	5.84
2	1	1.06	1		2	22.99	21.6	26.42
3	1.54	1.54	1.51		3	18.975	11.46	12.655
4	2.07	1.74	1.32		4	8.69	6.94	8.99
5	0.98	0.94	0.86		5	16.55	12.63	19.9
6	0.86	0.9	0.86		6	8.67	5.42	4.54
7	1.22	1.22	1.22		7	7.68	6.18	6.51
8	2.98	1.79	1.6		8	14	14.8	7.42
9	1.32	1.15	1.74		9	11.05	9.85	7.78
10	0.99	1	1.14		10	15.14	25.5	10.11
11	0.86	0.84	0.86		11	4.77	4.49	3.84
12	1.64	1.68	1.265		12	4.62	8.465	7.72
	Obstacle position: Left					Obstacle position: Left
Subject number	Trial 1	Trial 2	Trial 3		Subject number	Trial 1	Trial 2	Trial 3
1	0.98	0.94	0.96		1	4.84	3.29	7
2	1.14	1.06	1		2	27.47	27.5	24.22
3	1.64	1.67	1.28		3	21.79	19.43	16.66
4	1.53	1.3	1.35		4	6.76	8.06	11.06
5	0.86	0.97	0.82		5	19.86	12.54	10.24
6	0.87	0.82	0.82		6	5.84	7.08	5.73
7	0.92	0.94	0.98		7	5.88	5.86	7.84
8	1.33	1.18	1.24		8	13.65	13.45	15.31
9	1.12	1.13	0.98		9	8.25	7.52	7.2
10	0.9	1	0.97		10	15.14	13.02	13.6
11	2.26	0.78	0.83		11	5	5.17	4.32
12	1.3	1.28	1.22		12	4.305	12.635	10.275

## Sheet: Velocity corrections
	Vision					SSD
	Obstacle position: Right					Obstacle position: Right
Subject number	Trial 1	Trial 2	Trial 3		Subject number	Trial 1	Trial 2	Trial 3
1	3	3	3		1	19	20	18.5
2	3	3.5	3		2	45	42	51
3	3.5	4	4.5		3	16.5	27.5	28.5
4	4	6	3.5		4	11.5	14	14
5	3	3	3		5	30	21	16.5
6	4	4	4		6	8.5	13.5	9.5
7	3.5	3.5	3.5		7	12.5	17	20
8	5	3.5	4.5		8	12.5	23	9.5
9	4	4.5	3.5		9	11	19	16
10	3.5	3	4.5		10	14.5	30.5	28.5
11	2.5	3	3		11	8	9	7.5
12	8.5	6.5	7		12	17.5	19.5	22
	Obstacle position: Midline					Obstacle position: Midline
Subject number	Trial 1	Trial 2	Trial 3		Subject number	Trial 1	Trial 2	Trial 3
1	3	3.5	5.5		1	18.5	11.5	17
2	5	2.5	4		2	45	30	57.5
3	3.5	4	7.5		3	25.5	23	17.5
4	6.5	4.5	3.5		4	17	16	15
5	4.5	3	3		5	33.5	20	32
6	4	3.5	4.5		6	15	8.5	9.5
7	4	4	4		7	16	12	13.5
8	14	5	9		8	24.5	20.5	13.5
9	4	4	6		9	28	29.5	24
10	4.5	4.5	5		10	31.5	53.5	20.5
11	3.5	3	3		11	6	7.5	5
12	8	8	6		12	8	19.5	18
	Obstacle position: Left					Obstacle position: Left
Subject number	Trial 1	Trial 2	Trial 3		Subject number	Trial 1	Trial 2	Trial 3
1	3.5	3	3.5		1	13	5.5	19.5
2	5.5	4	4		2	50.5	67	46.5
3	4	4.5	3.5		3	33	27	29
4	4	4	4.5		4	14	14.5	19
5	4	4.5	2.5		5	35	29.5	22
6	3.5	3.5	3.5		6	8	16	9.5
7	3.5	5.5	3.5		7	12.5	14.5	15.5
8	4	3.5	3.5		8	25.5	24.5	33
9	5	5	3.5		9	26.5	18	17
10	3	4	3		10	23.5	26.5	25
11	4	3	3		11	10.5	10.5	11
12	6	5	5.5		12	12.5	32.5	26
